# Supplementary material
Source: PubMed Central journal article supplement (PMC4382402)

**Supplementary Table S1** All significant molecular pathways between SRL vs. Tac groups

| <b>Number</b> | <b>Ingenuity Canonical Pathways</b>                                            | <b><i>p</i>-value</b> |
|---------------|--------------------------------------------------------------------------------|-----------------------|
| 1             | Xenobiotic Metabolism Signaling                                                | 0.0001                |
| 2             | Production of Nitric Oxide and Reactive Oxygen Species in Macrophages          | 0.0003                |
| 3             | Synaptic Long Term Depression                                                  | 0.0006                |
| 4             | Estrogen Biosynthesis                                                          | 0.0007                |
| 5             | IL-12 Signaling and Production in Macrophages                                  | 0.0007                |
| 6             | PXR/RXR Activation                                                             | 0.0008                |
| 7             | Antigen Presentation Pathway                                                   | 0.0008                |
| 8             | Endothelin-1 Signaling                                                         | 0.0009                |
| 9             | LXR/RXR Activation                                                             | 0.0009                |
| 10            | Bupropion Degradation                                                          | 0.0009                |
| 11            | Type I Diabetes Mellitus Signaling                                             | 0.002                 |
| 12            | Acetone Degradation I (to Methylglyoxal)                                       | 0.002                 |
| 13            | LPS/IL-1 Mediated Inhibition of RXR Function                                   | 0.003                 |
| 14            | OX40 Signaling Pathway                                                         | 0.003                 |
| 15            | Factors Promoting Cardiogenesis in Vertebrates                                 | 0.004                 |
| 16            | Neuropathic Pain Signaling In Dorsal Horn Neurons                              | 0.004                 |
| 17            | Leukocyte Extravasation Signaling                                              | 0.006                 |
| 18            | Acute Phase Response Signaling                                                 | 0.006                 |
| 19            | Role of Macrophages, Fibroblasts and Endothelial Cells in Rheumatoid Arthritis | 0.007                 |
| 20            | Cytotoxic T Lymphocyte-mediated Apoptosis of Target Cells                      | 0.007                 |
| 21            | Remodeling of Epithelial Adherens Junctions                                    | 0.008                 |
| 22            | Aldosterone Signaling in Epithelial Cells                                      | 0.009                 |
| 23            | Sperm Motility                                                                 | 0.010                 |
| 24            | Antioxidant Action of Vitamin C                                                | 0.011                 |
| 25            | Induction of Apoptosis by HIV1                                                 | 0.012                 |
| 26            | TWEAK Signaling                                                                | 0.012                 |
| 27            | Molecular Mechanisms of Cancer                                                 | 0.013                 |
| 28            | Graft-versus-Host Disease Signaling                                            | 0.013                 |
| 29            | Atherosclerosis Signaling                                                      | 0.014                 |
| 30            | Melatonin Signaling                                                            | 0.014                 |
| 31            | Protein Kinase A Signaling                                                     | 0.015                 |

|    |                                                            |       |
|----|------------------------------------------------------------|-------|
| 32 | Granulocyte Adhesion and Diapedesis                        | 0.017 |
| 33 | Autoimmune Thyroid Disease Signaling                       | 0.017 |
| 34 | Eicosanoid Signaling                                       | 0.018 |
| 35 | Dendritic Cell Maturation                                  | 0.019 |
| 36 | Synaptic Long Term Potentiation                            | 0.019 |
| 37 | Aryl Hydrocarbon Receptor Signaling                        | 0.020 |
| 38 | Calcium-induced T Lymphocyte Apoptosis                     | 0.021 |
| 39 | Nitric Oxide Signaling in the Cardiovascular System        | 0.022 |
| 40 | Phospholipases                                             | 0.022 |
| 41 | Glutathione-mediated Detoxification                        | 0.023 |
| 42 | Tyrosine Degradation I                                     | 0.023 |
| 43 | Noradrenaline and Adrenaline Degradation                   | 0.023 |
| 44 | UVB-Induced MAPK Signaling                                 | 0.023 |
| 45 | Role of PKR in Interferon Induction and Antiviral Response | 0.026 |
| 46 | Gap Junction Signaling                                     | 0.027 |
| 47 | Nicotine Degradation II                                    | 0.030 |
| 48 | Wnt/ $\beta$ -catenin Signaling                            | 0.030 |
| 49 | IL-10 Signaling                                            | 0.032 |
| 50 | IL-8 Signaling                                             | 0.032 |
| 51 | Apoptosis Signaling                                        | 0.032 |
| 52 | Nicotine Degradation III                                   | 0.032 |
| 53 | Ethanol Degradation II                                     | 0.034 |
| 54 | Growth Hormone Signaling                                   | 0.034 |
| 55 | Chemokine Signaling                                        | 0.034 |
| 56 | Cell Cycle: G2/M DNA Damage Checkpoint Regulation          | 0.037 |
| 57 | Dopamine-DARPP32 Feedback in cAMP Signaling                | 0.037 |
| 58 | UVA-Induced MAPK Signaling                                 | 0.041 |
| 59 | p70S6K Signaling                                           | 0.041 |
| 60 | NRF2-mediated Oxidative Stress Response                    | 0.042 |
| 61 | Cdc42 Signaling                                            | 0.044 |
| 62 | RAN Signaling                                              | 0.044 |
| 63 | B Cell Development                                         | 0.045 |
| 64 | Hepatic Cholestasis                                        | 0.049 |
| 65 | Epithelial Adherens Junction Signaling                     | 0.049 |

## Supplemental Information

We aimed to validate some of the genes differentially expressed between groups (TAC vs. SRL) that were relevant in specific pathways associated with immune response. Specifically, we choose for the validation genes that were statistically differentially expressed between groups and associated with IL-12 signaling and Production in Macrophages, Antigen Presentation, and Allograft rejection. These canonical pathways were identified as relevant between groups (**Supplemental Figure 1**).

Specifically, reverse transcription quantitative real time PCR (RT-qPCR) was performed for quantifying the expression of lysozyme (LYZ) (Assay ID: Hs00426232\_m1), and toll-like receptor 2 (TLR2) (Assay ID: HS01872448\_s1), STAT1 (Assay ID: Hs01013996\_m1), and IRF8 (Assay: Hs01128712\_m1), using pre-developed TaqMan® gene expression assays (Life Technologies, Carlsbad, CA) following the manufacturer's protocol. For initial reverse transcription reactions (TaqMan Reverse Transcription Reagents Kit (Life Technologies)), RNA from the same samples and stock tubes used in the microarray analysis were evaluated. Glyceraldehyde 3-phosphate dehydrogenase (GAPDH, ID: 4310884E) expression was used as the endogenous control for normalization. Gene expression fold changes were obtained using the delta Ct calculation model between the target gene mean cycle threshold (Ct) and GAPDH Ct as endogenous control, or  $\Delta\text{Ct}(\text{gene}) - \Delta\text{Ct}(\text{GAPDH})$ . Two tailed t test was performed to compare the mean expression between samples for the validated genes. A  $p$ -value  $< 0.05$  were considered significant. Threshold cycle (Ct) values were used to calculate relative expression using the  $\Delta\Delta\text{Ct}$  method.

**Validation of microarray results for 4 genes up-regulated in the SRL group when compared to TAC group using RT-qPCR reactions.**

All the studied genes were differentially up-regulated in the SRL converted group and in concordance with the microarray results ( $p < 0.05$ ) (**Supplemental Figure-2**). These results validate the microarray findings by using a different reaction using the same tested total RNAs and confirm the relevance of the identified differential pathways.

**Supplemental Figure 1:** Canonical pathways identified as with genes differentially expressed between studied groups.

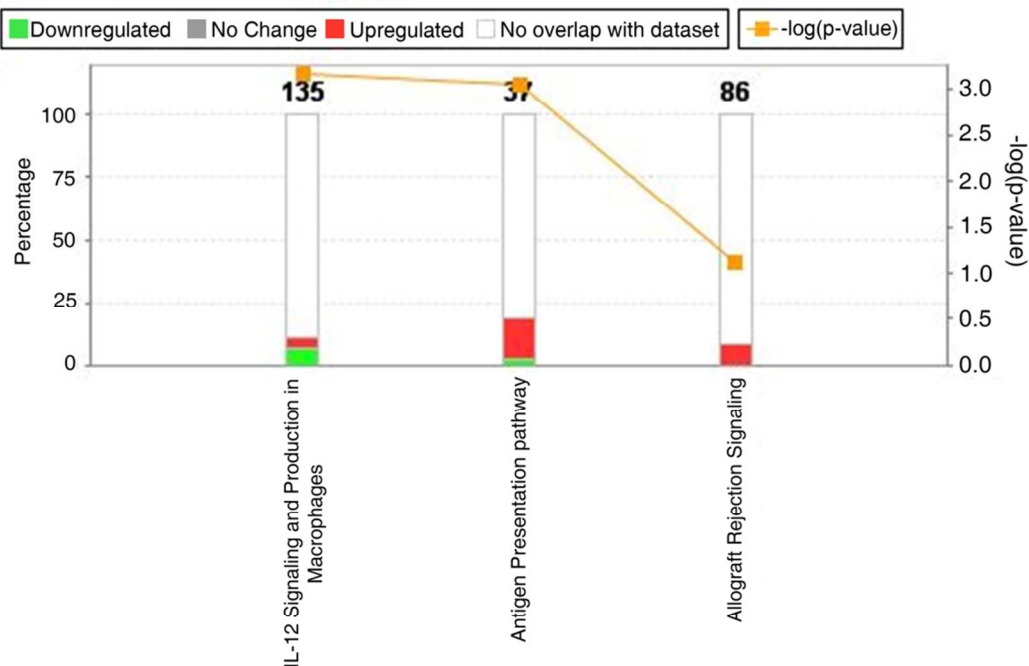

**Supplemental Figure 2:** Graphical representation of the average fold changes detected by RT-qPCR when comparing SRL converted samples to TAC samples. Changes in gene expression were calculated using the  $\Delta\Delta C_t$  method. GAPDH was used as the endogenous control. Two tailed t test was performed to compare the mean expression between samples for the validated genes. A  $p$ -value  $< 0.05$  were considered significant.

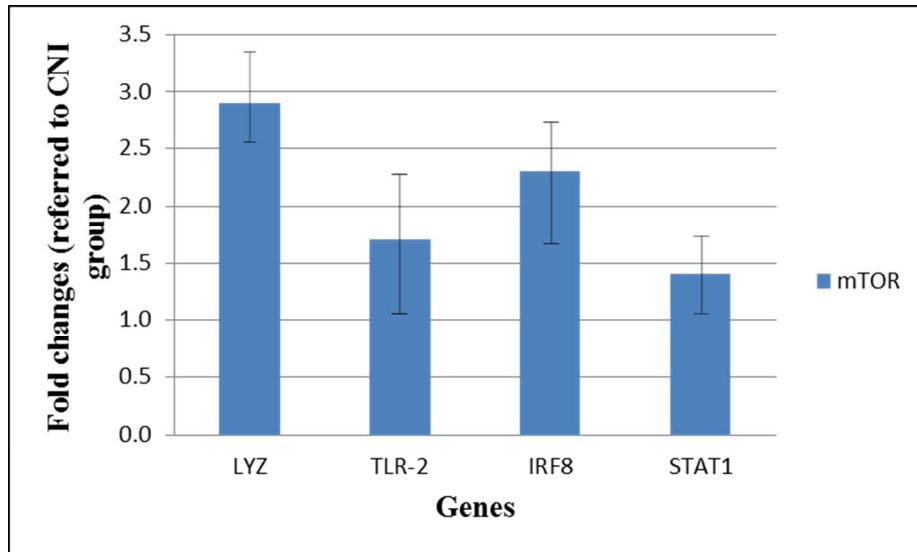

Supplement: NIHMS630786-supplement-supplement_1.pdf [file NIHMS630786-supplement-supplement_1.pdf]
